# Supplementary material for: Seroprevalence of SARS-CoV-2 antibodies in people with an acute loss in their sense of smell and/or taste in a community-based population in London, UK: An observational cohort study
Source: PLoS Med. 2020 Oct 1;17(10):e1003358. doi: 10.1371/journal.pmed.1003358 (PMC7529306; doi:10.1371/journal.pmed.1003358)
Supplement: S1 Data — (XLSX) [file pmed.1003358.s003.xlsx]

## Sheet: Sheet1
Gender (1=Female, 2=Male, 3=other)	Age	Loss of smell (1=yes)	Complete (2) or partial (1) loss of smell	Loss of taste (1=yes)	Complete (2) or partial (1) loss of taste	BaselineCough	BaselineFever	BaselineShortnessOfBreath	BaselineHeadache	BaselineSoreThroat	BaselineHoarseVoice	BaselineChestPainTightness	BaslineAbdominalPain	BaselineDiarrhoea	BaselineVomiting	BaslineConfusionDisorientationOrDrowsiness	BaselineMuscleJointAches	HasYourAppetiteForFoodDecreased	HaveYouEverSmoked	SARS-CoV-2 test result (1=positive)
1	53.9781	1	1	1	1	0	0	0	1	1	0	0	1	1	0	0	1	1	Ex-smoker	0
1	52.8438	0	0	1	1	1	0	1	1	1	0	1	0	1	0	0	1	1	Ex-smoker	0
1	52.5671	0	0	1	1	0	0	0	1	1	1	1	1	0	0	0	1	1	Ex-smoker	0
1	38.4548	1	1	1	1	0	1	0	0	1	0	0	0	0	0	0	1	0	Never smoked	0
1	72.4575	1	2	1	2	0	1	1	0	1	1	1	1	1	0	1	0	1	Never smoked	0
1	43.8055	0	0	1	1	1	0	1	1	1	0	1	1	1	0	0	1	1	Ex-smoker	0
1	29.9973	1	2	1	1	0	0	0	1	1	0	0	0	0	0	0	1	1	Never smoked	0
1	48.5479	1	1	1	1	1	0	1	1	1	0	1	0	0	0	1	0	1	Ex-smoker	0
1	74.1342	1	1	1	1	1	0	0	0	1	1	0	0	1	0	1	1	1	Never smoked	0
1	36.3205	1	1	1	1	1	1	0	1	1	0	0	0	0	0	0	0	0	Never smoked	0
1	33.5288	0	0	1	1	1	0	0	1	1	0	0	0	0	0	0	0	1	Never smoked	0
1	75.0055	1	1	1	1	0	0	0	1	0	0	0	1	1	0	0	1	0	Ex-smoker	0
1	24.1644	1	2	1	1	0	0	0	0	0	0	0	0	0	0	0	0	0	Ex-smoker	0
1	27.263	1	1	1	1	1	1	0	1	1	0	0	0	0	0	1	1	1	Never smoked	0
1	65.1452	1	2	1	1	0	1	0	1	1	0	0	1	1	0	0	1	1	Ex-smoker	0
1	30.4986	1	1	1	1	1	0	1	0	1	1	1	0	0	0	1	0	0	Ex-smoker	0
1	46.1151	1	1	1	1	1	1	0	1	1	0	0	0	1	0	0	1	1	Ex-smoker	0
1	36.4274	1	1	1	1	0	0	0	1	1	0	1	0	0	0	0	1	0	Never smoked	0
1	57.2356	0	0	1	1	0	0	0	1	1	1	0	1	0	0	1	1	1	Ex-smoker	0
1	33.5096	1	1	0	0	1	0	1	1	0	0	0	1	1	0	0	1	0	Never smoked	0
1	44.1534	0	0	1	1	0	0	0	1	0	0	0	0	1	0	0	0	0	Current smoker	0
1	22.4904	1	1	0	0	0	0	0	1	0	0	1	1	1	0	0	0	1	Never smoked	0
1	66.5151	0	0	1	1	1	0	0	0	1	0	0	0	0	0	0	0	0	Never smoked	0
1	50.0493	0	0	1	1	0	0	0	1	1	0	0	1	1	0	1	1	1	Current smoker	0
1	38.3836	1	1	1	1	0	0	0	1	0	0	0	0	1	0	0	0	1	Never smoked	0
1	24.5753	0	0	1	1	0	0	0	0	0	1	0	0	0	0	0	0	0	Never smoked	0
1	32.8712	1	1	0	0	0	1	1	1	0	0	1	1	0	0	1	1	0	Never smoked	0
1	27.6822	1	2	1	2	0	0	0	0	1	0	0	0	0	0	0	0	1	Never smoked	0
1	50.7068	0	0	1	1	0	1	0	1	1	0	0	1	0	0	1	1	1	Ex-smoker	0
1	47.4685	1	1	1	1	1	0	0	1	0	0	1	1	1	0	0	1	1	Ex-smoker	0
1	30.7233	1	2	1	2	0	0	0	0	0	0	0	0	0	0	1	0	0	Never smoked	0
1	30.3205	1	2	1	1	0	0	0	0	0	0	0	0	0	0	0	0	0	Never smoked	0
1	24.0356	1	2	1	2	1	1	1	1	1	0	1	0	0	0	0	0	1	Ex-smoker	0
1	35.1096	1	1	1	2	0	0	0	0	0	0	0	0	0	0	0	0	0	Ex-smoker	0
1	28.6137	1	2	1	1	0	0	0	1	0	0	0	1	0	0	1	1	1	Never smoked	0
1	21.7041	1	2	1	2	1	1	0	0	1	0	0	0	0	0	0	1	1	Never smoked	0
1	51.8411	0	0	1	1	0	0	0	1	1	0	0	1	1	0	1	1	1	Current smoker	0
1	35.4192	1	2	1	2	1	1	1	0	1	0	1	0	0	0	1	1	1	Ex-smoker	0
1	29.9945	1	2	1	2	0	0	0	1	0	0	0	0	0	0	0	0	1	Ex-smoker	0
1	70.2904	1	1	1	1	1	1	0	0	1	1	1	1	1	0	1	0	1	Never smoked	0
1	33.1534	1	1	0	0	0	0	0	1	1	0	1	1	1	1	1	1	0	Never smoked	0
1	46.3233	1	1	1	1	1	1	1	1	0	1	1	1	0	0	1	1	1	Current smoker	0
1	45.5699	1	1	1	1	1	0	0	0	1	1	0	0	0	0	1	0	0	Current smoker	0
1	28.4219	0	0	1	1	1	0	1	0	1	0	1	0	1	0	0	0	0	Never smoked	0
1	60.2164	1	2	1	1	1	0	1	0	0	0	0	0	0	0	1	0	0	Current smoker	0
1	36.3699	1	1	0	0	1	0	1	1	1	0	0	1	1	0	1	1	0	Current smoker	0
1	28.2685	1	1	1	1	0	0	1	1	1	1	1	0	1	0	0	1	1	Never smoked	0
1	38.1808	0	0	1	1	0	0	0	0	0	0	0	0	0	0	0	0	1	Ex-smoker	0
1	30.0329	1	1	1	1	0	0	0	1	1	0	0	1	0	0	1	1	1	Ex-smoker	0
1	26.8493	1	1	1	1	0	0	1	1	0	0	1	1	0	0	1	1	1	Current smoker	0
1	54.7863	1	2	1	1	1	0	1	0	0	0	1	0	0	0	0	1	1	Never smoked	0
1	35.8	1	2	1	1	0	1	1	0	1	0	0	0	0	0	1	1	1	Ex-smoker	0
1	37.3808	1	2	1	1	1	0	0	1	0	0	0	1	1	0	0	1	0	Never smoked	0
1	52.6932	1	2	1	2	1	1	1	1	1	1	1	0	1	0	1	1	1	Current smoker	0
1	46.2712	0	0	1	2	0	0	0	0	0	0	0	0	0	0	0	0	0	Ex-smoker	0
1	56.8767	1	1	1	2	0	0	0	1	0	0	0	1	1	0	0	0	1	Ex-smoker	0
1	36.5096	1	2	1	2	0	0	0	0	0	0	0	0	0	0	0	0	0	Ex-smoker	0
1	52.3507	1	1	1	1	1	0	0	0	1	0	0	0	1	0	0	1	1	Ex-smoker	0
1	38.2822	1	1	0	0	0	0	0	1	0	0	0	0	1	0	0	0	0	Ex-smoker	0
1	31.2822	1	2	1	1	0	0	0	0	0	0	0	0	0	0	0	0	0	Never smoked	0
1	23.3452	1	1	1	1	1	0	1	1	1	0	1	0	0	0	1	0	1	Never smoked	0
1	28.5945	1	2	1	1	0	0	1	0	0	0	0	0	0	0	0	0	0	Never smoked	0
1	44.3863	1	2	1	2	0	0	0	0	0	0	0	0	0	0	0	0	1	Never smoked	0
1	28.1397	1	2	1	2	1	1	1	1	0	0	1	0	0	0	1	1	1	Never smoked	0
1	21.7918	1	2	1	2	0	0	1	1	1	1	1	0	0	0	1	1	0	Never smoked	0
1	63.2055	1	2	1	2	1	0	1	1	1	1	1	1	1	0	0	1	1	Ex-smoker	0
1	35.4027	1	2	1	2	0	1	0	0	0	0	0	0	1	0	0	0	1	Never smoked	0
1	29.3753	1	2	1	2	1	0	1	1	0	1	1	0	1	0	0	1	1	Never smoked	0
1	53.1808	0	0	1	1	1	0	0	1	0	0	0	0	0	0	0	1	0	Never smoked	0
1	32.8082	1	1	1	1	0	0	1	1	1	0	0	0	0	0	1	1	0	Ex-smoker	0
1	33.3808	0	0	1	1	1	0	1	0	0	0	0	0	1	0	0	1	1	Ex-smoker	0
1	33.811	1	1	1	1	1	1	1	1	1	0	1	0	0	0	1	1	1	Ex-smoker	0
1	27.2685	1	2	1	2	1	0	0	0	0	0	0	0	0	0	0	0	1	Never smoked	0
1	27.7589	1	1	1	1	1	1	0	1	1	1	0	1	1	0	1	1	0	Never smoked	0
1	54.4877	0	0	1	1	0	0	0	1	0	1	1	0	0	0	1	1	1	Never smoked	0
1	66.5507	1	2	1	2	0	0	0	1	1	0	0	1	1	0	0	1	1	Ex-smoker	0
1	33.9014	1	2	0	0	1	0	0	0	1	1	0	0	0	0	0	1	0	Never smoked	0
1	38.1068	1	1	1	2	1	1	1	1	1	1	1	0	0	0	0	1	1	Never smoked	0
1	25.7507	0	0	1	1	1	1	0	1	0	0	0	0	0	0	1	1	1	Never smoked	0
1	26.3068	1	1	1	1	1	1	1	1	1	0	1	0	0	0	0	1	1	Never smoked	0
1	31.9616	1	2	0	0	0	1	0	1	1	0	0	0	0	0	0	0	0	Never smoked	0
1	35.0904	1	1	1	1	0	0	0	0	0	0	0	0	0	0	0	1	1	Never smoked	1
1	46.5753	1	2	1	1	1	1	1	1	1	0	1	0	0	0	1	1	1	Ex-smoker	1
1	30.474	1	2	1	2	0	0	0	1	1	0	0	0	0	0	0	0	0	Never smoked	1
1	46.7918	1	1	1	1	1	1	0	0	0	0	0	0	0	0	1	0	0	Ex-smoker	1
1	36.1699	1	2	0	0	0	1	1	1	1	0	1	0	0	0	1	1	0	Never smoked	1
1	20.8658	1	1	1	1	1	0	0	1	0	0	1	0	0	0	0	0	1	Never smoked	1
1	37.6658	1	2	1	2	0	0	0	1	1	1	1	0	1	0	0	1	1	Never smoked	1
1	59.8164	1	2	0	0	0	1	0	1	0	0	0	0	0	0	0	0	0	Ex-smoker	1
1	46.2795	1	2	1	2	0	1	0	1	0	0	0	0	0	0	0	1	1	Never smoked	1
1	55.6192	1	2	1	2	1	1	1	1	1	0	0	1	1	0	1	1	1	Ex-smoker	1
1	52.3808	1	2	1	2	1	0	0	0	1	1	1	0	0	0	0	1	0	Never smoked	1
1	35.0767	1	1	1	2	0	0	1	0	0	1	0	0	1	0	0	1	1	Ex-smoker	1
1	41.189	1	2	1	2	1	1	1	1	1	1	1	0	1	0	0	1	1	Never smoked	1
1	41.3014	1	2	1	1	0	0	0	0	0	0	0	0	0	0	0	0	0	Never smoked	1
1	50.8	1	2	1	2	0	0	1	1	0	0	0	0	0	0	0	0	0	Never smoked	1
1	53.2274	1	2	1	2	1	0	0	1	1	0	0	1	1	0	1	1	1	Never smoked	1
1	26.8466	1	2	1	2	0	1	0	1	1	0	0	0	1	0	0	1	0	Ex-smoker	1
1	56.1151	1	2	0	0	0	0	0	0	0	0	0	0	0	0	0	1	0	Never smoked	1
1	52.211	1	2	1	2	0	1	0	1	1	0	0	0	0	0	0	0	1	Never smoked	1
1	37.3151	1	2	1	2	1	0	1	0	0	0	1	0	0	0	1	0	1	Ex-smoker	1
1	48.0932	1	2	1	2	1	0	1	1	0	0	1	0	0	0	0	1	1	Ex-smoker	1
1	53.9014	1	2	1	1	1	0	0	1	1	0	1	0	0	0	0	1	0	Ex-smoker	1
1	58.2438	1	1	1	2	1	1	1	1	1	1	1	1	0	0	1	1	1	Never smoked	1
1	50.8027	1	2	1	1	1	1	0	1	1	0	0	0	0	0	0	1	1	Ex-smoker	1
1	35.6493	1	2	1	2	0	0	0	1	1	0	0	0	0	0	0	1	0	Never smoked	1
1	29.4849	1	2	1	1	1	1	1	1	1	0	1	0	0	0	0	1	1	Never smoked	1
1	31.2849	1	2	0	0	1	1	1	1	0	0	1	0	0	0	1	1	0	Never smoked	1
1	29.5096	1	2	1	2	0	0	1	1	0	1	1	0	0	0	1	0	1	Ex-smoker	1
1	30.7836	1	1	1	2	0	0	1	1	1	1	0	0	0	0	0	1	1	Never smoked	1
1	45.4986	1	2	0	0	1	1	1	1	0	0	1	0	0	0	0	0	0	Ex-smoker	1
1	41.4658	1	2	1	2	1	0	0	1	0	0	0	0	1	0	0	1	0	Never smoked	1
1	31.4822	1	2	1	1	0	1	1	1	1	0	0	0	0	0	0	1	1	Current smoker	1
1	25.5726	1	2	1	2	1	1	1	1	1	0	1	0	0	0	1	1	1	Never smoked	1
1	29.2055	1	2	1	2	1	1	0	1	1	0	1	0	0	0	0	1	0	Never smoked	1
1	44.9945	1	2	0	0	1	1	1	1	0	0	1	0	1	0	1	1	1	Ex-smoker	1
1	34.1342	1	2	1	2	1	1	0	0	1	0	0	0	1	0	0	1	0	Never smoked	1
1	38.7589	1	2	1	1	1	1	0	1	1	1	0	0	0	0	0	1	1	Ex-smoker	1
1	36.6685	1	1	1	1	1	0	1	1	0	0	1	0	0	0	0	1	0	Never smoked	1
1	23.6329	1	2	1	2	1	1	1	1	1	0	1	0	1	0	1	1	1	Never smoked	1
1	42.3479	1	1	1	1	0	1	0	1	0	0	0	1	1	0	0	1	1	Never smoked	1
1	39.8329	1	1	1	1	0	1	1	1	0	0	1	1	1	0	1	1	0	Ex-smoker	1
1	42.8164	1	2	0	0	1	1	0	0	0	0	1	0	1	0	0	1	0	Ex-smoker	1
1	22.2356	1	2	1	2	1	0	1	1	1	1	1	0	0	0	0	1	1	Current smoker	1
1	34.9781	1	2	1	1	0	0	0	0	0	0	0	0	0	0	0	0	0	Current smoker	1
1	37.1781	1	2	1	2	1	1	0	1	0	0	0	0	0	0	0	1	1	Never smoked	1
1	23.4822	1	1	0	0	0	0	1	1	0	0	0	0	0	0	0	1	1	Never smoked	1
1	30.5671	1	2	1	2	1	1	1	1	1	0	1	1	1	0	1	1	1	Never smoked	1
1	57.4027	1	2	1	2	1	1	0	1	0	0	1	0	0	0	0	1	1	Never smoked	1
1	34.9589	1	2	1	2	0	0	0	0	0	0	0	0	0	0	0	0	1	Never smoked	1
1	40.1178	1	2	1	2	0	1	1	1	1	0	1	0	0	0	1	1	0	Ex-smoker	1
1	46.1397	1	2	1	2	1	0	0	1	0	0	0	1	0	0	0	1	0	Ex-smoker	1
1	46.4301	0	0	1	1	0	0	0	1	0	0	0	0	0	0	0	0	0	Never smoked	1
1	34.1973	1	2	1	1	1	0	0	0	1	0	0	0	0	0	0	0	0	Never smoked	1
1	24.9342	1	2	0	0	0	0	0	0	1	0	0	0	0	0	0	0	0	Never smoked	1
1	44.0575	1	2	1	1	1	0	0	1	1	1	1	0	1	0	1	1	1	Current smoker	1
1	24.3178	1	2	1	2	0	0	0	1	0	0	0	0	0	0	0	1	1	Ex-smoker	1
1	45.0192	1	2	1	2	0	0	0	0	0	0	1	0	0	0	0	0	1	Never smoked	1
1	60.6137	1	2	0	0	0	0	0	1	0	0	0	0	0	0	0	0	0	Ex-smoker	1
1	33.3945	1	2	1	2	0	0	0	0	0	0	0	0	0	0	0	0	1	Never smoked	1
1	23.6247	0	0	1	2	0	0	0	0	1	0	0	1	1	0	1	1	1	Never smoked	1
1	48.674	1	2	1	2	1	0	1	0	1	0	0	0	0	0	0	1	0	Ex-smoker	1
1	30.6301	1	2	1	2	1	0	0	0	0	0	1	0	0	0	0	1	1	Never smoked	1
1	48.1808	1	2	1	1	1	1	0	1	0	0	0	0	0	0	1	1	1	Never smoked	1
1	28.011	1	2	0	0	0	1	0	1	1	0	0	0	0	0	0	0	0	Never smoked	1
1	38.8301	1	2	1	2	0	1	1	1	1	1	1	0	0	0	1	1	1	Never smoked	1
1	22.7534	1	2	1	1	1	1	1	1	1	1	1	0	0	0	0	1	1	Never smoked	1
1	55.4247	1	2	1	1	0	0	1	0	1	0	1	0	0	0	1	0	1	Never smoked	1
1	25.1123	1	2	1	2	0	1	0	1	0	0	0	0	1	0	0	1	1	Never smoked	1
1	41.4877	1	2	1	1	1	1	0	1	0	0	1	0	1	0	0	1	1	Never smoked	1
1	40.3726	1	2	1	1	0	0	1	0	0	0	1	0	0	0	0	0	1	Never smoked	1
1	32.0219	1	2	1	1	1	1	1	0	1	0	1	0	1	1	1	1	0	Ex-smoker	1
1	31.7589	1	1	1	1	0	0	0	0	0	0	0	0	0	0	0	0	0	Ex-smoker	1
1	47.9562	1	1	1	1	1	1	1	1	1	0	1	1	0	0	1	1	1	Never smoked	1
1	49.7014	1	2	1	2	0	0	0	0	0	0	0	0	0	0	0	0	1	Never smoked	1
1	26.6822	1	1	1	1	0	0	0	0	0	0	0	0	0	0	0	0	0	Never smoked	1
1	30.9315	1	2	1	2	1	0	0	1	0	0	0	0	0	0	0	1	0	Never smoked	1
1	24.2603	0	0	1	1	1	1	1	1	1	0	1	0	1	1	1	1	1	Never smoked	1
1	64.6822	1	2	1	2	1	1	0	1	1	0	1	0	0	0	0	1	1	Ex-smoker	1
1	42.5699	1	2	1	2	1	0	1	1	0	0	1	1	1	0	1	1	1	Never smoked	1
1	34.4411	1	2	1	2	0	0	0	1	0	0	0	1	1	0	1	1	0	Never smoked	1
1	24.8959	1	2	1	2	0	0	1	1	0	0	0	0	0	0	0	0	0	Never smoked	1
1	30.4548	1	2	1	2	1	0	1	1	0	0	1	0	0	0	1	0	1	Never smoked	1
1	49.4658	1	2	1	2	1	0	1	1	1	1	1	1	1	0	1	1	1	Never smoked	1
1	31.1562	1	1	1	1	0	0	0	1	0	0	0	0	0	1	0	1	1	Never smoked	1
1	25.6301	1	2	1	2	1	0	0	1	1	1	0	0	0	0	0	0	0	Never smoked	1
1	32.3562	1	2	1	2	0	0	0	1	1	0	0	1	1	0	0	1	0	Never smoked	1
1	50.4986	1	2	1	1	0	1	1	1	1	0	1	1	0	0	1	1	0	Never smoked	1
1	40.2548	1	2	1	2	0	0	0	0	0	0	0	0	0	0	0	0	0	Never smoked	1
1	33.8384	1	1	1	2	1	0	1	0	0	0	0	0	0	0	0	0	0	Never smoked	1
1	31.3233	1	2	1	2	0	0	0	1	0	0	0	0	0	0	0	0	1	Ex-smoker	1
1	29.4877	1	2	1	2	0	0	0	1	1	0	0	0	0	0	0	0	0	Never smoked	1
1	37.9342	1	2	1	1	0	0	0	1	0	1	0	0	1	0	0	1	1	Ex-smoker	1
1	39.989	1	2	1	2	0	0	0	0	0	0	0	0	0	0	0	0	0	Never smoked	1
1	30.211	1	1	0	0	0	0	0	0	0	0	0	0	0	0	0	0	1	Never smoked	1
1	30.1644	1	2	1	1	1	1	1	0	0	0	1	0	0	0	0	0	1	Never smoked	1
1	26.2384	0	0	1	1	0	1	0	1	1	0	0	0	1	0	1	0	1	Never smoked	1
1	43.8301	1	2	1	2	1	0	0	1	0	0	0	0	0	0	0	1	0	Ex-smoker	1
1	25.2329	0	0	1	1	0	0	0	0	0	0	0	0	0	0	0	1	0	Never smoked	1
1	44.1151	1	1	1	1	1	1	1	1	0	0	1	1	0	0	0	1	0	Ex-smoker	1
1	42.1781	1	2	1	1	1	0	0	0	0	1	0	0	0	0	0	0	1	Never smoked	1
1	43.8575	1	1	1	1	0	0	0	1	1	0	0	0	1	0	1	1	1	Never smoked	1
1	36.6438	1	1	0	0	1	1	0	1	0	0	1	0	0	0	0	1	0	Never smoked	1
1	34.8356	1	2	1	2	1	0	1	1	0	0	1	0	0	0	0	1	1	Ex-smoker	1
1	26.3315	1	2	1	2	1	0	1	1	1	0	0	1	1	0	0	1	1	Never smoked	1
1	39.6986	1	2	1	2	0	0	1	0	1	0	0	1	0	0	0	0	0	Never smoked	1
1	54.3836	1	2	1	2	0	0	0	1	0	1	1	0	1	0	0	1	1	Never smoked	1
1	62.6849	1	2	1	2	0	1	1	1	0	0	1	0	0	0	1	1	1	Ex-smoker	1
1	22.937	1	2	1	1	1	1	1	1	0	0	1	0	0	0	1	1	1	Current smoker	1
1	30.6356	1	2	0	0	1	0	0	0	0	0	0	0	0	0	0	0	0	Never smoked	1
1	43.7808	1	2	1	2	1	0	1	1	1	1	0	0	0	0	1	1	1	Never smoked	1
1	32.8219	1	2	1	1	0	0	1	0	1	0	0	0	0	0	0	1	1	Never smoked	1
1	55.6877	1	2	1	1	1	1	1	1	1	0	1	1	0	0	1	1	1	Never smoked	1
1	58.6192	1	2	1	2	1	1	1	0	1	1	0	1	1	0	0	1	1	Never smoked	1
1	29.9945	1	1	1	2	1	0	1	1	1	0	1	1	0	0	0	1	1	Never smoked	1
1	61.2438	1	2	1	2	1	1	0	0	1	0	0	0	1	0	1	0	1	Never smoked	1
1	37.2986	1	2	1	2	1	1	1	1	1	0	1	0	1	0	0	1	1	Ex-smoker	1
1	39.9671	1	1	1	2	1	1	0	1	1	0	0	0	0	0	1	1	1	Ex-smoker	1
1	29.2137	1	2	1	2	0	0	0	1	0	0	1	1	1	0	1	1	1	Never smoked	1
1	58.6849	1	1	0	0	0	0	0	1	0	0	1	0	0	0	0	0	0	Never smoked	1
1	45.8548	0	0	1	2	1	0	1	1	1	0	1	0	0	0	1	1	1	Ex-smoker	1
1	26.5945	1	2	0	0	0	0	0	0	0	0	0	0	0	1	0	0	0	Never smoked	1
1	20.937	1	1	1	1	1	0	1	1	1	0	1	1	1	0	0	0	0	Never smoked	1
1	36.4932	1	1	0	0	0	0	0	0	0	0	0	0	0	0	0	0	0	Ex-smoker	1
1	23.2521	1	2	1	1	1	1	0	1	1	1	0	0	0	0	0	0	0	Never smoked	1
1	24.589	1	1	1	1	0	0	0	1	1	0	0	0	0	0	0	0	0	Never smoked	1
1	25.5534	1	1	1	1	0	0	0	1	0	0	0	0	0	0	0	0	0	Current smoker	1
1	25.7178	1	2	1	2	1	1	1	1	0	1	1	1	1	1	1	0	1	Current smoker	1
1	43.9178	1	2	1	2	1	0	0	1	0	0	0	0	0	0	1	0	1	Ex-smoker	1
1	36.7671	1	2	1	2	0	0	1	1	1	0	1	0	0	1	0	1	1	Ex-smoker	1
1	28.7507	1	2	1	1	0	0	0	1	1	0	0	0	0	0	0	0	1	Never smoked	1
1	30.0384	1	1	1	1	1	1	0	1	0	0	1	0	1	0	0	1	1	Never smoked	1
1	36.0055	1	1	1	1	0	0	0	1	0	0	0	1	0	0	0	1	1	Never smoked	1
1	23.4603	1	2	1	1	0	1	0	1	0	0	0	0	0	0	1	1	1	Never smoked	1
1	23.8575	1	2	1	2	0	0	0	0	0	0	0	0	0	0	1	0	1	Ex-smoker	1
1	42.0986	1	1	1	2	0	0	0	0	0	0	0	0	0	0	0	0	0	Never smoked	1
1	29.3123	1	2	1	1	1	1	1	1	0	0	1	0	0	0	0	0	1	Ex-smoker	1
1	33.9562	1	2	1	2	0	0	0	0	0	0	0	0	0	0	0	1	1	Never smoked	1
1	44.3178	1	2	1	2	0	0	0	0	0	0	0	0	0	0	0	1	0	Ex-smoker	1
1	26.2767	1	1	1	1	0	0	0	1	1	1	1	1	1	1	1	1	1	Ex-smoker	1
1	30.6877	1	2	1	2	0	0	0	1	0	0	0	0	1	0	1	0	1	Ex-smoker	1
1	43.6548	1	2	1	1	0	0	0	0	0	0	0	0	0	0	0	0	0	Never smoked	1
1	25.0575	1	2	1	2	0	0	0	0	0	0	0	0	0	0	0	0	1	Never smoked	1
1	40.6986	1	2	1	2	0	0	0	1	0	0	0	0	1	0	1	1	1	Never smoked	1
1	32.9699	1	2	1	2	0	0	0	0	0	0	0	0	0	0	0	1	0	Never smoked	1
1	30.389	1	1	1	1	0	0	0	1	0	0	1	0	0	0	0	1	0	Ex-smoker	1
1	27.6822	1	2	1	1	0	0	0	1	0	0	0	0	0	0	0	1	1	Never smoked	1
1	32.8329	1	2	1	2	0	0	0	1	0	0	0	0	0	0	0	0	0	Ex-smoker	1
1	54.2822	1	2	0	0	1	1	1	1	1	0	1	0	0	0	1	1	1	Never smoked	1
1	54.0164	1	1	1	1	1	1	1	1	1	1	0	0	1	0	1	1	1	Current smoker	1
1	20.9315	1	1	1	2	0	0	1	0	1	1	0	0	0	0	0	1	0	Never smoked	1
1	28.4192	1	2	1	1	0	0	0	1	1	0	1	0	0	0	0	1	0	Ex-smoker	1
1	26.1178	1	2	1	2	1	1	0	1	0	0	0	0	1	0	0	1	1	Current smoker	1
1	38.2575	1	1	1	1	0	0	0	0	1	0	0	0	0	0	0	0	0	Ex-smoker	1
1	53.9068	0	0	1	1	1	0	0	1	1	1	1	0	0	0	1	1	0	Current smoker	1
1	24.926	1	1	0	0	1	0	0	1	0	0	0	0	0	0	1	1	0	Ex-smoker	1
1	46.6822	1	2	1	2	1	1	1	0	0	1	0	0	1	0	1	1	1	Ex-smoker	1
1	55.8164	1	2	1	1	1	0	1	1	0	0	0	0	0	0	1	1	1	Never smoked	1
1	64.0932	1	2	1	2	1	1	0	1	1	0	0	0	0	0	0	1	1	Never smoked	1
1	31.737	1	2	1	2	0	0	0	0	1	0	0	0	1	0	0	0	1	Never smoked	1
1	55.4329	1	1	1	1	0	0	0	1	0	0	0	0	1	0	1	0	1	Ex-smoker	1
1	35.6274	1	1	0	0	0	1	0	0	0	0	0	0	0	0	0	1	0	Never smoked	1
1	21.526	1	2	1	2	0	1	0	1	1	1	0	1	1	0	0	1	1	Never smoked	1
1	21.2575	1	2	1	2	0	0	0	1	0	1	1	0	0	0	0	1	0	Ex-smoker	1
1	32.2548	1	2	0	0	0	0	1	1	1	0	1	1	0	0	1	1	1	Ex-smoker	1
1	28.3726	1	1	1	1	1	1	0	1	0	0	0	0	0	0	1	1	1	Never smoked	1
1	70.1726	1	1	1	2	1	1	0	1	1	1	0	0	1	0	1	1	1	Never smoked	1
1	59.0849	0	0	1	1	0	1	0	0	1	0	1	1	1	0	1	0	1	Ex-smoker	1
1	30.4959	1	1	1	2	0	0	0	0	0	0	0	0	0	0	0	0	1	Never smoked	1
1	20.6055	1	2	1	2	0	0	0	0	0	0	0	0	1	0	0	0	0	Never smoked	1
1	38.589	1	2	1	2	1	1	1	1	0	0	1	1	1	1	0	1	1	Ex-smoker	1
1	53.3425	1	1	1	1	1	1	0	1	1	0	0	0	0	0	1	1	1	Never smoked	1
1	25.9041	1	2	1	2	0	1	0	1	0	0	0	0	0	0	1	0	1	Ex-smoker	1
1	46.7315	1	2	1	2	0	0	0	0	0	1	0	0	0	0	0	0	0	Ex-smoker	1
1	28.2466	1	1	1	1	1	1	1	0	1	0	1	0	0	0	1	1	1	Ex-smoker	1
1	45.6466	0	0	1	1	1	1	0	1	1	1	1	0	1	0	1	1	1	Never smoked	1
1	25.0685	1	2	1	2	0	0	0	1	0	0	0	0	0	0	1	0	1	Never smoked	1
1	26.1973	1	2	1	1	1	1	1	1	1	0	1	1	1	0	1	1	1	Never smoked	1
1	34.5671	1	1	1	1	0	0	1	0	1	0	1	0	1	0	0	0	1	Never smoked	1
1	67.7288	1	2	1	1	0	0	0	1	1	0	0	0	0	0	0	1	1	Ex-smoker	1
1	73.2082	0	0	1	1	0	0	0	1	1	0	0	0	0	1	0	0	0	Never smoked	1
1	64.2959	1	2	1	2	1	1	0	1	1	0	0	0	0	0	0	1	1	Never smoked	1
1	31.6932	1	2	1	2	0	0	0	0	0	0	0	0	0	0	0	0	1	Never smoked	1
1	44.2027	1	2	1	1	0	0	0	0	1	1	0	0	0	0	0	1	1	Ex-smoker	1
1	40.1315	1	2	1	2	1	1	1	1	0	0	1	0	1	0	0	1	0	Never smoked	1
1	23.211	1	2	1	2	1	0	1	1	0	0	1	0	0	0	0	0	1	Never smoked	1
1	35.7534	1	2	1	2	0	0	0	0	0	0	0	0	0	0	0	0	0	Ex-smoker	1
1	34.2767	1	1	1	1	1	1	1	1	0	0	1	0	0	0	1	1	1	Never smoked	1
1	43.4685	1	2	1	1	1	0	1	1	1	1	0	0	0	0	1	1	1	Never smoked	1
1	44.1425	1	2	1	1	0	0	0	0	0	0	0	0	0	0	0	0	1	Never smoked	1
1	54.9945	1	2	1	2	1	0	1	1	1	0	1	0	0	0	0	1	1	Ex-smoker	1
1	34.0384	1	2	1	1	0	0	0	1	0	0	0	0	1	0	1	0	1	Ex-smoker	1
1	35.611	1	2	1	1	1	0	0	1	0	0	0	0	0	0	1	0	0	Never smoked	1
1	39.7014	1	1	1	1	0	0	0	0	0	0	0	0	0	0	0	0	0	Never smoked	1
1	30.2027	1	2	1	2	0	0	0	0	0	0	0	0	0	0	1	0	0	Never smoked	1
1	33.5068	1	1	1	1	0	0	0	0	0	0	0	0	0	0	0	0	0	Never smoked	1
1	30.5753	1	2	1	2	0	0	0	0	1	0	0	0	0	0	0	0	1	Never smoked	1
1	38.1534	1	2	0	0	0	0	0	1	1	0	0	1	1	0	1	1	0	Ex-smoker	1
1	39.3726	1	2	1	2	0	1	0	1	0	0	0	1	1	0	0	1	1	Never smoked	1
1	44.737	1	2	1	2	0	1	1	1	1	1	1	1	1	0	1	1	0	Ex-smoker	1
1	54.6027	1	2	1	1	1	1	1	0	1	1	0	0	0	0	0	0	1	Never smoked	1
1	24.9123	1	2	1	2	0	0	0	0	0	0	0	0	1	0	0	0	0	Never smoked	1
1	28.9781	1	2	0	0	0	0	1	0	0	1	1	0	0	0	0	0	0	Ex-smoker	1
1	32.4164	1	2	1	1	0	0	1	1	0	1	1	0	0	0	1	1	1	Ex-smoker	1
1	40.8329	1	2	1	2	1	1	1	1	0	0	1	1	1	1	1	1	1	Never smoked	1
1	42.6329	1	2	1	2	0	0	0	0	1	0	0	0	0	0	0	0	0	Never smoked	1
1	36.3808	1	1	1	2	1	1	1	1	1	1	1	0	0	0	0	1	0	Never smoked	1
1	38.6959	1	2	1	2	0	0	1	1	0	0	0	0	0	0	0	1	1	Ex-smoker	1
1	44.1644	1	2	1	2	1	1	0	1	0	0	1	0	0	0	0	0	0	Never smoked	1
1	64.2055	1	2	1	1	1	0	1	1	0	0	0	0	0	0	0	1	1	Never smoked	1
1	27.4986	0	0	1	1	1	1	1	1	0	0	1	0	0	0	1	1	0	Ex-smoker	1
1	28.2329	1	2	1	1	1	1	0	1	0	0	0	0	1	0	1	1	1	Never smoked	1
1	42.9945	1	2	1	1	0	0	0	0	1	1	0	0	0	0	0	0	0	Never smoked	1
1	36.9616	1	1	0	0	0	0	1	1	1	1	1	1	1	0	1	1	0	Never smoked	1
1	32.6082	1	2	1	1	0	0	0	0	0	0	0	0	0	0	0	0	0	Current smoker	1
1	44.7014	1	1	1	1	1	1	0	1	1	0	0	1	0	0	1	1	1	Never smoked	1
1	40.9918	1	2	1	1	0	0	0	1	0	0	0	0	1	0	0	0	1	Never smoked	1
1	51.0027	1	2	1	2	0	1	1	1	1	0	0	0	1	0	0	1	1	Never smoked	1
1	27.126	1	2	0	0	1	0	0	1	0	0	0	0	0	0	0	0	1	Never smoked	1
1	46.2466	0	0	1	2	1	1	0	1	1	0	0	0	0	0	0	1	0	Ex-smoker	1
1	69.9863	1	2	1	1	1	0	0	0	0	0	0	0	1	0	0	0	0	Never smoked	1
1	46.7726	1	2	1	1	1	0	1	0	0	0	1	1	1	0	0	1	1	Never smoked	1
1	39.4959	1	2	1	2	1	0	0	1	1	0	0	0	0	0	0	1	0	Current smoker	1
1	26.5616	0	0	1	2	1	0	1	1	1	0	0	0	0	0	1	0	1	Never smoked	1
1	56.4082	0	0	1	1	0	0	0	1	0	0	0	1	0	0	0	1	1	Ex-smoker	1
1	28.9918	1	1	1	1	1	0	1	0	0	1	0	0	1	1	0	1	1	Ex-smoker	1
1	39.8301	1	2	1	2	0	0	0	1	0	0	0	0	0	0	0	1	0	Never smoked	1
1	28.4438	1	2	1	2	0	1	1	1	0	1	0	1	1	1	1	1	1	Ex-smoker	1
1	41.3808	1	2	0	0	1	0	0	0	0	0	0	0	0	0	0	0	0	Never smoked	1
1	29.389	1	2	1	2	1	0	1	1	0	0	1	0	0	0	0	1	0	Never smoked	1
1	46.0027	1	2	1	2	0	0	0	1	0	0	0	0	1	0	0	1	0	Never smoked	1
1	37.5616	1	2	1	2	0	1	1	1	0	0	1	0	0	0	0	1	1	Never smoked	1
1	41.7836	1	2	1	2	0	0	1	1	1	0	1	0	1	1	1	0	1	Never smoked	1
1	42.8548	1	2	1	2	1	1	0	1	1	0	0	0	0	0	0	1	1	Never smoked	1
1	42.2137	1	2	1	1	0	0	0	0	0	0	0	0	0	0	0	0	1	Ex-smoker	1
1	51.5397	1	2	1	1	1	0	0	0	0	1	0	0	0	0	0	1	0	Never smoked	1
1	40.4164	1	2	1	1	0	0	0	0	0	0	0	0	0	0	0	0	0	Never smoked	1
1	69.3425	1	1	1	1	0	0	0	0	1	0	0	1	0	0	0	1	1	Ex-smoker	1
1	34.3151	1	2	1	2	0	0	1	1	0	1	1	1	0	0	0	0	1	Ex-smoker	1
1	44.6219	1	2	1	1	0	0	0	1	1	0	0	0	0	0	0	1	1	Never smoked	1
1	30.526	1	2	1	2	0	0	0	1	0	0	1	0	0	0	0	1	1	Never smoked	1
1	30.2384	1	2	1	2	1	1	1	1	0	0	0	0	0	0	1	1	0	Never smoked	1
1	39.8137	1	2	1	2	0	0	0	1	0	0	0	0	0	0	0	1	1	Never smoked	1
1	28.7918	1	2	1	2	0	1	0	1	0	0	0	0	0	0	1	0	1	Current smoker	1
1	51.9096	1	2	1	1	0	1	1	0	0	0	1	0	0	0	1	0	0	Never smoked	1
1	38.2877	1	2	1	2	0	1	1	0	0	1	1	0	1	0	0	0	0	Ex-smoker	1
1	61.8411	1	2	1	2	1	1	1	1	1	0	0	0	0	0	0	1	1	Ex-smoker	1
1	36.1753	1	2	1	2	1	0	1	0	1	0	1	0	0	0	0	1	0	Never smoked	1
1	35.526	1	2	1	1	0	1	1	0	0	0	1	0	0	0	0	0	0	Never smoked	1
1	55.5726	1	1	1	1	1	0	0	1	1	0	0	0	0	0	0	1	1	Never smoked	1
1	38.5753	1	2	1	1	1	1	0	1	0	1	0	1	0	0	1	1	1	Never smoked	1
1	58.2055	1	2	0	0	0	0	0	0	0	0	0	0	0	0	0	0	0	Never smoked	1
1	43.811	1	2	1	1	0	0	0	1	1	0	1	0	1	0	1	0	1	Ex-smoker	1
1	31.5534	1	2	1	2	1	1	0	1	0	0	0	1	0	0	1	1	1	Never smoked	1
1	46.874	1	1	1	1	1	1	1	1	1	1	1	0	0	0	1	1	1	Current smoker	1
1	33.7205	1	2	1	2	0	0	0	1	1	0	0	0	0	0	0	1	1	Never smoked	1
1	31.4164	1	2	1	1	1	1	1	1	0	0	1	0	0	0	0	0	1	Never smoked	1
1	34.8521	1	2	1	2	0	0	0	1	0	0	1	0	1	0	0	0	1	Never smoked	1
1	60.189	1	1	1	1	0	0	1	0	0	0	0	1	0	0	0	0	1	Ex-smoker	1
1	28.8685	1	2	1	1	0	0	0	1	1	0	1	1	1	0	1	1	1	Ex-smoker	1
1	34.3178	1	2	1	2	1	0	1	1	0	0	1	0	0	0	0	1	1	Ex-smoker	1
1	56.4164	1	1	1	1	0	1	0	1	1	1	1	1	0	0	0	1	1	Ex-smoker	1
1	27.5534	1	2	1	2	0	0	0	0	0	0	0	0	0	0	0	0	1	Current smoker	1
1	55.6219	1	2	1	2	1	1	1	1	1	0	0	1	1	0	1	1	0	Current smoker	1
1	54.6301	1	1	1	1	1	1	0	0	0	0	0	0	1	0	0	0	0	Ex-smoker	1
1	28.5836	1	2	1	1	0	0	0	0	0	0	0	0	0	0	0	0	1	Never smoked	1
1	39.1205	1	2	1	1	0	0	0	1	1	1	0	0	0	0	0	1	1	Current smoker	1
1	36.7041	0	0	1	1	0	0	0	1	1	1	1	1	1	1	1	1	1	Ex-smoker	1
1	51.3616	0	0	1	1	0	0	0	0	0	0	0	0	0	0	0	0	0	Never smoked	1
1	56.7644	1	2	1	1	0	0	0	0	0	0	1	0	0	0	0	1	1	Current smoker	1
1	49.2	1	2	1	1	1	1	0	1	1	1	1	0	1	0	0	1	1	Never smoked	1
1	25.4767	1	2	1	2	0	0	0	1	0	0	1	0	0	0	0	0	0	Never smoked	1
1	50.6384	1	2	1	1	1	0	1	1	1	0	1	0	1	0	1	1	1	Never smoked	1
1	34.1342	1	1	1	1	0	0	0	0	0	0	0	0	0	0	1	0	0	Ex-smoker	1
1	53.1397	1	2	1	2	0	0	0	0	1	0	0	0	0	0	0	0	1	Current smoker	1
1	31.4411	1	1	1	2	1	1	1	1	1	0	1	0	0	0	0	1	1	Ex-smoker	1
1	37.2603	0	0	1	1	0	1	1	1	1	0	0	0	0	0	0	1	0	Never smoked	1
1	29.0685	1	2	1	1	0	0	0	1	0	0	0	0	0	0	0	0	0	Never smoked	1
1	57.7863	1	2	1	1	1	1	1	1	0	1	0	0	1	0	1	1	1	Ex-smoker	1
1	50.0329	1	1	1	1	0	0	0	1	0	0	0	1	0	0	1	1	0	Ex-smoker	1
1	55.9452	1	1	1	1	1	0	0	1	1	1	0	0	0	0	1	1	1	Never smoked	1
1	54.1863	0	0	1	1	1	0	1	1	1	0	0	0	0	0	1	0	1	Never smoked	1
1	33.5945	1	1	1	1	1	1	1	1	1	1	1	1	1	0	1	1	1	Never smoked	1
1	33.5863	1	2	1	2	0	1	1	1	0	0	0	0	1	0	0	1	1	Never smoked	1
1	43.5425	1	2	1	2	0	0	0	1	1	0	1	1	0	0	1	1	1	Ex-smoker	1
1	23.5781	1	2	1	2	1	1	0	0	1	0	0	0	0	0	0	1	1	Ex-smoker	1
1	38.5836	1	2	1	1	1	1	1	1	1	1	1	1	0	0	0	1	0	Current smoker	1
1	23.2055	1	2	1	1	1	0	0	1	1	0	0	1	0	0	0	0	1	Ex-smoker	1
1	37.9534	1	1	1	1	1	1	0	0	0	0	0	0	0	0	1	0	1	Never smoked	1
1	38.1562	1	2	0	0	0	0	0	0	0	0	0	0	0	0	0	0	0	Never smoked	1
1	41.4685	1	2	0	0	0	0	1	1	1	0	0	0	0	0	0	1	1	Never smoked	1
1	58.874	1	2	1	2	0	0	0	0	1	0	0	0	0	0	0	0	0	Current smoker	1
1	26.2329	1	2	1	2	1	1	1	1	1	0	0	0	1	0	1	1	1	Never smoked	1
1	26.6466	1	1	0	0	0	0	0	1	0	0	0	0	1	0	0	1	1	Current smoker	1
1	38.7671	1	1	1	1	1	0	1	1	0	0	1	0	0	0	1	0	1	Never smoked	1
1	42.9726	1	2	1	2	0	0	1	1	1	1	1	0	0	0	1	1	1	Ex-smoker	1
1	54.2137	1	2	1	2	1	1	1	0	0	0	1	0	1	0	1	0	0	Never smoked	1
1	34.1205	1	2	1	1	1	1	1	1	0	0	1	1	1	0	1	1	0	Ex-smoker	1
1	23.0575	1	1	1	1	1	1	1	0	0	0	1	0	0	0	1	1	1	Ex-smoker	1
1	36.4384	1	2	1	1	0	0	0	1	1	0	1	0	0	0	0	1	1	Current smoker	1
1	52.5014	1	2	1	1	1	1	0	0	0	0	1	0	0	0	0	0	1	Never smoked	1
1	46.5233	1	2	1	2	0	0	0	0	0	0	0	0	0	0	0	0	1	Never smoked	1
1	32.9973	1	1	1	1	0	0	0	1	1	0	0	0	0	0	1	0	1	Never smoked	1
1	41.1479	1	1	1	1	0	0	0	1	1	0	0	0	1	0	0	1	1	Never smoked	1
1	53.8822	1	1	1	1	1	0	1	1	0	0	1	0	0	0	1	1	0	Never smoked	1
1	61.5041	1	1	0	0	1	0	0	0	1	1	1	0	0	0	1	1	1	Ex-smoker	1
1	22.1288	0	0	1	1	0	1	0	1	1	1	1	1	1	0	1	0	1	Ex-smoker	1
1	40.6658	1	2	1	2	1	0	1	1	1	1	1	0	0	0	1	1	1	Never smoked	1
1	38.7699	1	2	1	2	0	1	1	1	0	0	1	0	1	0	1	1	1	Never smoked	1
1	46.0521	1	1	1	1	1	1	1	1	1	1	1	0	1	0	1	1	1	Never smoked	1
1	40.8329	1	1	1	1	0	0	0	1	0	0	0	0	0	0	0	0	1	Ex-smoker	1
1	60.0548	1	1	1	1	1	1	0	1	1	1	0	0	0	0	0	1	1	Ex-smoker	1
2	33.6356	1	2	1	2	1	0	0	1	0	0	0	0	0	0	0	0	0	Never smoked	0
2	49.6137	1	2	1	1	1	0	0	1	1	1	1	0	1	0	0	0	0	Ex-smoker	0
2	25.0055	1	2	1	1	0	0	0	0	0	0	0	0	0	0	0	0	0	Never smoked	0
2	37.6055	1	1	1	1	1	0	1	1	1	1	1	0	1	0	0	1	1	Never smoked	0
2	47.3945	0	0	1	2	1	0	1	1	0	0	0	0	0	0	0	0	0	Never smoked	0
2	40.2548	1	2	1	2	1	1	0	1	0	0	1	1	0	0	1	1	0	Never smoked	0
2	33.9671	1	2	1	1	1	0	1	1	1	0	0	0	0	0	0	0	1	Ex-smoker	0
2	34.1342	1	2	1	2	0	0	0	1	0	0	0	0	0	0	0	0	0	Never smoked	0
2	37.5151	1	1	0	0	0	0	1	1	1	0	0	0	0	0	1	1	0	Never smoked	0
2	46.9808	1	2	1	1	1	0	0	1	0	1	0	0	0	0	0	1	1	Never smoked	0
2	56.737	1	2	1	2	0	1	1	1	1	0	1	0	1	0	1	1	1	Ex-smoker	0
2	49.9699	1	2	1	1	0	0	0	0	0	0	0	0	0	0	0	0	0	Ex-smoker	0
2	61.8767	1	1	1	1	0	0	0	0	1	0	0	0	0	0	0	0	1	Ex-smoker	0
2	33.9973	1	2	1	1	1	0	0	0	0	0	0	0	0	0	0	0	1	Never smoked	0
2	29.6411	1	2	1	2	1	1	1	1	0	0	1	0	0	0	1	1	1	Never smoked	0
2	48.5452	1	1	0	0	0	0	0	1	0	0	0	0	0	0	0	0	1	Never smoked	0
2	30.8493	1	2	1	2	0	0	0	1	0	0	0	0	1	0	0	1	0	Never smoked	0
2	31.9096	1	1	1	1	1	1	1	0	1	0	1	0	1	0	0	1	0	Never smoked	0
2	35.2877	0	0	1	1	1	0	0	1	1	0	0	1	1	0	1	0	1	Ex-smoker	0
2	54.2575	1	1	0	0	1	1	1	1	1	1	1	0	0	0	0	1	1	Current smoker	0
2	41.4521	1	2	1	1	1	0	0	0	0	0	0	0	1	0	1	0	1	Current smoker	0
2	30.6932	0	0	1	2	0	0	0	0	0	0	0	0	0	0	0	0	0	Never smoked	0
2	39.6548	0	0	1	1	0	0	0	1	0	0	0	0	0	0	0	0	0	Never smoked	0
2	42.9342	1	1	0	0	0	0	0	0	0	0	0	0	0	0	0	0	0	Never smoked	0
2	66.1973	1	1	1	1	1	0	0	1	0	1	0	0	1	0	1	0	1	Never smoked	0
2	32.5699	0	0	1	1	0	0	0	1	0	0	0	0	0	0	0	0	0	Ex-smoker	0
2	29.3507	1	2	1	2	1	1	0	1	1	0	0	0	1	0	0	0	1	Never smoked	0
2	37.9041	1	1	1	1	0	0	0	0	1	0	0	0	1	0	0	1	0	Current smoker	0
2	27.5041	1	1	1	2	0	0	0	0	0	0	0	0	0	0	0	0	1	Current smoker	0
2	25.389	1	2	1	2	1	0	1	1	0	1	0	0	0	0	0	1	1	Never smoked	0
2	35.6822	1	2	1	1	0	0	0	0	0	0	0	0	0	0	0	1	0	Ex-smoker	0
2	48.274	1	1	1	1	0	1	0	1	1	0	0	1	1	0	0	0	1	Never smoked	0
2	44.8575	1	1	1	1	0	0	0	1	0	0	0	0	0	0	1	0	0	Current smoker	0
2	40.6712	1	2	1	2	1	0	0	0	1	0	0	0	0	0	0	1	0	Ex-smoker	0
2	56.2849	1	1	1	2	0	0	0	0	0	0	0	0	0	0	0	0	1	Never smoked	0
2	39.0849	1	2	1	1	1	0	1	1	1	1	0	0	0	1	0	1	1	Ex-smoker	0
2	51.1836	1	2	0	0	0	0	1	1	1	0	1	1	0	0	1	1	0	Ex-smoker	0
2	44.4164	1	2	0	0	0	0	0	1	0	0	0	0	0	0	0	0	1	Ex-smoker	0
2	38.4877	0	0	1	1	1	0	1	1	0	0	1	0	1	0	0	0	0	Ex-smoker	0
2	30.7562	1	1	1	1	1	0	0	0	1	0	0	1	0	0	0	0	0	Ex-smoker	0
2	39.1671	1	1	1	1	1	1	0	1	1	1	0	0	0	0	1	1	0	Never smoked	0
2	60.1836	1	1	1	1	0	0	0	0	1	0	1	0	0	0	0	0	0	Ex-smoker	0
2	40.3151	0	0	1	1	0	0	1	0	0	0	1	0	0	0	0	0	0	Current smoker	0
2	36.6548	0	0	1	1	0	0	0	1	1	1	0	0	1	0	1	1	1	Current smoker	0
2	50.5918	1	1	1	1	1	0	0	0	0	0	0	0	0	0	0	0	0	Never smoked	0
2	44.7781	0	0	1	1	1	1	1	1	1	0	0	0	0	0	1	1	1	Never smoked	0
2	30.2603	1	1	1	1	0	0	0	0	0	0	0	0	0	0	0	1	0	Never smoked	1
2	25.8329	1	2	1	2	0	0	0	0	0	0	0	0	0	0	0	0	0	Current smoker	1
2	34.9671	1	2	1	2	0	1	0	1	0	0	0	0	0	0	0	1	0	Ex-smoker	1
2	31.0849	1	2	1	2	1	0	1	0	0	0	1	0	1	1	0	0	0	Never smoked	1
2	34.0575	1	2	1	2	0	0	0	1	0	0	0	0	0	0	0	0	1	Ex-smoker	1
2	36.8685	1	2	1	1	0	1	1	1	1	0	0	0	0	0	1	1	0	Never smoked	1
2	61.1151	1	2	1	1	1	0	0	0	0	0	0	1	1	0	0	1	0	Ex-smoker	1
2	53.4466	1	2	1	2	1	0	0	0	0	0	0	0	0	0	0	0	0	Ex-smoker	1
2	59.2548	1	2	1	2	0	0	1	0	0	0	0	0	0	0	0	1	0	Ex-smoker	1
2	43.3014	1	2	1	1	1	0	0	0	0	0	0	0	0	0	0	0	0	Never smoked	1
2	29.063	1	2	1	2	0	0	0	1	0	0	0	0	0	0	0	1	1	Never smoked	1
2	62.989	1	1	1	1	1	1	1	1	1	0	1	0	1	0	1	1	0	Ex-smoker	1
2	33.3479	0	0	1	1	1	1	0	0	1	0	1	0	0	0	0	1	0	Never smoked	1
2	38.4	1	2	1	1	1	1	0	1	0	0	1	0	1	0	0	1	0	Current smoker	1
2	26.4767	1	2	1	2	0	0	0	1	1	0	1	0	0	0	1	1	1	Ex-smoker	1
2	43.6192	1	2	1	1	1	1	1	1	0	0	0	0	0	0	1	1	1	Never smoked	1
2	65.9479	1	2	1	2	1	1	0	0	1	0	0	0	1	0	1	1	1	Never smoked	1
2	46.6192	1	1	1	1	0	0	1	0	0	0	1	0	0	0	0	1	0	Never smoked	1
2	33.2493	1	2	0	0	1	0	0	0	0	0	0	0	0	0	0	1	0	Never smoked	1
2	47.8548	1	2	1	1	1	0	0	0	0	0	1	0	0	0	0	1	0	Never smoked	1
2	24.6247	1	2	1	2	1	1	1	1	0	0	0	0	1	1	1	1	1	Ex-smoker	1
2	45.8082	1	2	1	1	0	0	0	0	0	1	0	0	0	0	0	1	0	Current smoker	1
2	29.0575	1	2	1	2	1	1	1	0	1	1	1	0	0	0	1	0	0	Ex-smoker	1
2	25.726	1	2	1	1	1	0	1	1	1	1	1	0	1	0	0	0	0	Ex-smoker	1
2	32.1836	1	1	1	1	0	0	1	0	0	0	0	0	0	0	1	0	1	Ex-smoker	1
2	33.6137	1	2	1	2	1	1	1	1	1	0	1	0	1	0	0	1	1	Never smoked	1
2	47.4164	1	2	1	2	0	0	0	0	0	0	0	0	0	0	0	0	0	Ex-smoker	1
2	31.0192	1	2	1	2	0	0	0	0	0	0	0	0	0	0	0	0	0	Never smoked	1
2	30.1233	1	2	1	2	0	0	0	0	1	0	0	0	0	0	0	0	0	Never smoked	1
2	28.789	1	2	1	2	0	1	0	1	0	0	0	0	0	0	0	1	1	Current smoker	1
2	42.4247	1	2	1	1	1	1	0	1	0	0	1	1	1	0	0	1	0	Never smoked	1
2	23.6055	1	1	0	0	1	0	1	1	0	0	0	0	0	0	0	1	1	Never smoked	1
2	43.9589	1	1	1	1	0	0	0	1	0	0	0	0	0	0	1	1	0	Ex-smoker	1
2	35.2548	1	2	0	0	1	0	0	1	0	0	0	0	0	0	1	1	0	Never smoked	1
2	35.9151	1	2	1	2	0	1	0	1	0	0	1	0	0	0	0	1	0	Never smoked	1
2	53.3507	1	1	0	0	1	0	0	0	0	0	1	0	0	0	0	0	0	Never smoked	1
2	28.0438	1	2	1	1	1	0	0	1	0	0	1	0	0	0	1	0	1	Never smoked	1
2	55.4	1	2	1	2	1	0	1	1	0	0	1	0	0	0	0	1	1	Ex-smoker	1
2	30.5562	1	2	1	1	1	0	1	1	0	0	1	0	0	0	1	1	0	Ex-smoker	1
2	32.9644	1	2	1	2	1	1	1	1	1	0	1	0	0	0	1	1	0	Ex-smoker	1
2	47.0986	1	2	1	2	1	0	0	1	0	0	0	0	0	0	1	1	1	Ex-smoker	1
2	22.3315	1	2	0	0	1	0	0	1	1	0	0	0	0	0	0	0	0	Never smoked	1
2	46.8055	1	2	1	2	0	0	0	0	0	0	0	0	0	0	0	0	0	Ex-smoker	1
2	59.263	1	2	1	2	0	0	1	1	0	0	0	0	1	0	0	1	1	Never smoked	1
2	46.4658	1	2	1	2	1	1	1	1	1	0	0	0	0	0	0	1	1	Never smoked	1
2	32.5425	1	2	1	2	1	0	0	0	0	0	0	0	0	0	1	1	1	Never smoked	1
2	32.7699	1	1	1	1	0	1	1	0	1	0	0	0	0	0	0	1	0	Ex-smoker	1
2	30.211	1	1	1	1	1	0	1	1	1	0	1	1	1	0	1	0	1	Never smoked	1
2	21.937	1	2	1	2	0	1	0	1	0	0	0	0	0	0	1	0	0	Ex-smoker	1
2	30.9562	1	1	1	2	0	0	0	0	0	0	0	0	0	0	0	0	0	Ex-smoker	1
2	29.2164	1	2	1	1	1	0	0	0	1	0	1	0	0	0	0	0	0	Never smoked	1
2	33.8137	1	2	1	2	1	0	0	0	0	0	0	0	0	0	0	0	0	Never smoked	1
2	27.8082	1	2	1	2	1	1	1	1	1	0	1	0	0	0	0	0	0	Never smoked	1
2	33.4438	1	1	1	1	1	0	1	0	1	1	1	0	0	0	0	1	1	Ex-smoker	1
2	31.863	1	2	1	1	1	1	1	1	1	0	1	0	1	0	0	1	1	Ex-smoker	1
2	42.5863	1	2	1	2	1	0	0	1	0	0	1	0	0	0	0	0	0	Current smoker	1
2	30.0384	1	2	1	2	0	0	0	1	1	0	0	0	0	0	0	1	1	Current smoker	1
2	54.2548	1	2	1	2	0	0	0	1	1	0	0	0	0	0	0	0	1	Never smoked	1
2	23.9479	1	2	1	2	1	0	1	1	1	0	0	0	0	0	0	1	1	Ex-smoker	1
2	25.0904	1	1	1	1	1	0	0	0	0	0	0	0	1	0	1	1	1	Never smoked	1
2	34.9315	0	0	1	2	0	1	0	1	0	0	0	0	0	0	1	1	1	Never smoked	1
2	25.5041	1	2	0	0	0	1	0	0	0	0	0	0	0	0	0	1	0	Never smoked	1
2	42.1315	1	2	1	2	1	1	1	1	0	0	1	0	0	0	1	1	1	Never smoked	1
2	22.4904	1	2	1	2	0	0	0	0	0	0	0	0	0	0	0	0	0	Ex-smoker	1
2	25.2356	1	2	1	2	1	1	0	1	1	0	1	1	0	0	1	1	1	Ex-smoker	1
2	37.9671	1	2	1	1	1	0	1	0	0	0	1	0	0	0	0	0	0	Current smoker	1
2	21.8548	1	2	1	2	0	0	0	0	0	0	0	0	0	0	0	0	1	Never smoked	1
2	30.8356	1	2	1	2	0	0	0	1	0	0	0	0	0	0	0	1	0	Never smoked	1
2	37.0685	1	2	1	2	0	0	0	0	0	0	0	0	0	0	0	0	1	Ex-smoker	1
2	22.7014	1	1	1	1	0	1	0	0	1	0	0	0	1	0	0	1	0	Never smoked	1
2	26.189	1	2	1	2	0	0	0	0	0	0	0	0	0	0	0	0	1	Never smoked	1
2	55.463	0	0	1	1	0	0	1	0	1	0	0	0	1	0	0	0	0	Ex-smoker	1
2	51.4164	1	1	1	2	0	1	0	1	0	0	1	0	1	0	0	1	1	Ex-smoker	1
2	28.3014	1	2	1	1	1	1	1	1	1	0	1	0	0	0	0	1	1	Ex-smoker	1
2	22.8849	1	2	1	2	0	0	0	0	0	0	0	0	0	0	0	0	1	Never smoked	1
2	28.3534	1	1	0	0	1	0	1	0	0	0	0	0	0	0	0	0	0	Never smoked	1
2	30.0685	1	1	1	1	0	1	0	1	0	0	0	0	0	0	0	0	0	Never smoked	1
2	26.1836	1	2	1	2	0	0	0	0	0	0	0	0	0	0	0	0	0	Current smoker	1
2	45.5014	1	1	1	2	1	1	1	1	0	1	1	0	1	0	1	1	1	Ex-smoker	1
2	43.3479	1	1	1	1	0	0	1	1	1	1	1	0	1	0	0	1	1	Ex-smoker	1
2	46.8384	1	1	1	2	1	0	0	0	1	0	0	0	0	0	0	0	0	Never smoked	1
2	38.6877	1	2	1	2	1	0	1	0	0	0	1	0	0	0	0	1	1	Never smoked	1
2	53.8438	1	2	1	2	1	1	1	1	1	0	1	1	0	0	0	1	0	Ex-smoker	1
2	29.611	0	0	1	1	0	0	0	0	0	0	0	0	0	0	0	0	0	Never smoked	1
2	53.9836	1	1	1	1	1	1	0	1	1	0	0	0	0	0	0	1	1	Current smoker	1
2	52.2548	1	1	0	0	1	0	1	0	0	0	1	0	0	0	1	1	0	Ex-smoker	1
2	18.3863	1	2	1	2	0	1	0	1	0	0	0	0	0	0	0	1	0	Never smoked	1
2	26.1753	1	2	1	2	1	0	0	0	0	0	0	0	0	0	0	0	1	Current smoker	1
2	27.4466	1	2	1	1	0	0	0	0	0	0	0	0	0	0	0	0	0	Ex-smoker	1
2	28.0356	1	2	1	1	1	1	0	1	0	0	0	0	1	0	0	0	0	Never smoked	1
2	30.5699	0	0	1	1	1	0	0	1	1	0	0	0	1	0	0	1	1	Never smoked	1
2	36.9041	1	2	1	2	1	0	0	0	1	0	1	0	1	0	0	0	0	Ex-smoker	1
2	27.2466	1	2	1	2	0	0	0	1	0	0	0	0	0	0	0	1	1	Never smoked	1
2	55.5945	1	2	1	1	1	0	0	1	1	0	0	1	0	0	1	1	0	Ex-smoker	1
2	67.9973	1	2	1	2	1	1	1	0	0	0	1	0	0	0	0	1	1	Ex-smoker	1
2	34.6685	1	2	1	1	0	1	0	1	0	0	0	0	0	0	0	1	1	Ex-smoker	1
2	34.2932	1	2	1	1	0	0	0	1	0	0	0	0	0	0	0	0	0	Ex-smoker	1
2	35.3507	1	1	1	1	0	1	0	1	1	0	0	0	0	0	0	0	1	Never smoked	1
2	38.4795	1	2	1	1	1	1	1	1	1	0	1	0	0	0	0	1	1	Never smoked	1
2	34.0767	1	2	0	0	0	0	0	0	0	0	0	0	0	0	0	0	0	Never smoked	1
2	37.6219	0	0	1	1	0	1	1	1	0	0	0	0	0	0	1	1	0	Ex-smoker	1
2	24.9425	1	2	1	2	0	1	0	1	0	0	0	1	0	0	0	0	0	Ex-smoker	1
2	69.9781	1	2	1	2	1	0	0	0	1	1	0	0	0	0	0	0	0	Never smoked	1
2	57.211	0	0	1	1	1	1	0	1	0	0	0	0	1	0	0	1	0	Ex-smoker	1
2	58.9041	1	2	1	2	1	1	0	1	0	0	1	0	0	0	0	1	1	Current smoker	1
2	69.2164	1	2	0	0	0	0	0	1	1	0	0	0	0	0	0	0	0	Never smoked	1
2	49.3205	1	2	1	2	0	0	0	0	0	0	0	0	0	0	0	1	1	Never smoked	1
2	53.6685	1	1	1	1	0	0	0	1	1	1	1	0	0	0	1	1	0	Ex-smoker	1
2	62.0356	1	1	1	1	1	0	1	1	0	1	0	0	0	0	0	1	1	Ex-smoker	1
2	32.7562	1	1	1	1	1	1	0	0	1	1	0	0	1	0	1	1	1	Ex-smoker	1
2	56.1096	1	2	1	1	0	0	0	1	0	0	0	0	0	0	1	1	0	Current smoker	1
2	20.6767	1	2	1	2	1	1	1	1	0	0	1	1	0	0	1	1	1	Never smoked	1
2	40.9589	1	1	1	1	0	1	0	1	0	0	0	0	1	0	0	1	1	Never smoked	1
2	31.4685	1	2	1	2	0	0	0	1	0	0	0	0	0	0	0	1	0	Ex-smoker	1
2	36.2822	1	2	1	2	0	0	0	0	0	0	0	0	0	0	0	0	0	Never smoked	1
2	60.8	1	1	1	1	1	0	1	1	1	1	1	1	0	0	1	0	1	Never smoked	1
2	18.726	0	0	1	2	0	0	0	0	0	0	0	0	0	0	0	0	0	Never smoked	1
2	33.0877	1	2	1	1	1	0	1	1	1	1	1	0	1	0	0	1	0	Current smoker	1
2	61.3671	1	1	1	1	0	1	0	1	0	1	0	0	0	0	0	1	0	Never smoked	1
2	28.6329	0	0	1	1	0	0	0	1	1	1	0	0	0	0	0	0	1	Never smoked	1
2	48.0411	1	1	0	0	0	0	1	1	0	0	0	0	0	0	0	1	1	Never smoked	1
2	21.8192	1	1	1	2	1	1	0	1	0	0	0	1	1	0	0	1	1	Ex-smoker	1
2	59.6164	1	2	1	1	1	0	0	0	0	0	0	0	0	0	0	1	1	Never smoked	1
2	56.1726	1	1	1	1	1	0	1	1	0	1	1	1	1	0	1	1	1	Never smoked	1
2	31.9534	0	0	1	1	0	0	0	0	1	0	0	0	0	0	0	0	0	Never smoked	1
2	36.2055	1	1	0	0	1	0	0	0	0	0	0	0	0	0	0	0	0	Never smoked	1
2	54.0712	1	2	1	1	0	1	0	0	0	0	0	0	0	0	0	0	1	Current smoker	1
3	31.3205	1	2	1	2	0	1	0	0	0	0	0	0	1	0	0	0	0	Current smoker	1
3	34.7178	1	2	1	2	1	1	1	1	1	0	1	0	0	0	1	1	1	Never smoked	1
